# Supplementary material
Source: ML conference proceedings conference paper supplement (https://openaccess.thecvf.com/content/ICCV2025/html/Peng_On_the_Provable_ICCV_2025_paper.html)
Supplement: Supplementary file 1 [file Peng_On_the_Provable_ICCV_2025_supplemental.pdf]

# On the Provable Importance of Gradients for Autonomous Language-Assisted Image Clustering

## Supplementary Material

### 1. Notations and Datasets

Here we summarize the important notations in Table 1 and the details of datasets in Table 2.

### 2. Derivation of Eq. (6) in Main Content

$$\begin{aligned}
 \left\| \frac{\partial \ell(h(\tilde{\mathbf{r}}_i; \mathbf{W}^*), \tilde{y}_i)}{\partial \mathbf{W}^*} \right\|_F^2 &= \sum_{k=1}^C \left\| \frac{\partial \ell(h(\tilde{\mathbf{r}}_i; \mathbf{W}^*), \tilde{y}_i)}{\partial \mathbf{w}_k^*} \right\|_2^2 \\
 &= \sum_{k=1}^C \|\tau \cdot [\tilde{\pi}_{ik} - \mathbb{I}(k = \tilde{y}_i)] \tilde{\mathbf{r}}_i\|_2^2 \\
 &= \tau^2 \cdot \sum_{k=1}^C \|(\tilde{\pi}_{ik} - \mathbb{I}(k = \tilde{y}_i))\|^2 \\
 &= \tau^2 \sum_{k \neq \tilde{y}_i} \tilde{\pi}_{ik}^2 + \tau^2 (\max_{j \in [C]} \tilde{\pi}_{ij} - 1)^2 \\
 &= \tau^2 \cdot \left( \sum_{k \in [C]} \tilde{\pi}_{ik}^2 + 1 - 2 \max_{j \in [C]} \tilde{\pi}_{ij} \right),
 \end{aligned}$$

where the last two step holds due to the fact that  $\tilde{y}_i = \arg \min_{j \in [C]} \ell(h(\tilde{\mathbf{r}}_i; \mathbf{W}^*), j) = \arg \max_{k \in [C]} \tilde{\pi}_{ik}$ .

### 3. Assumptions, Propositions and Lemmas

**Assumption 1** ( $\gamma$ -smoothness). *The loss function  $\ell(\cdot, \cdot)$  (defined over  $\mathcal{Z} \times \mathcal{Y}$ ) is  $\gamma$ -smooth such that, for any  $\mathbf{z} \in \mathcal{Z}$ ,  $y \in [C]$ , and  $\mathbf{W}, \mathbf{W}' \in \mathcal{W}$ ,*

$$|\ell(h(\mathbf{z}; \mathbf{W}), y) - \ell(h(\mathbf{z}; \mathbf{W}'), y)| \leq \gamma \|\mathbf{W} - \mathbf{W}'\|_F.$$

**Assumption 2** ( $(\rho, \epsilon, \delta)$ -Boundness). *The parameter space  $\mathcal{W} \subset \{\mathbf{W} \in \mathbb{R}^{d \times C} : \|\mathbf{W} - \mathbf{W}_0\|_F \leq \rho\}$  is within a Frobenius ball of radius  $\rho$  around the given point  $\mathbf{W}_0$  that should satisfy the following properties:*

1.  $\sup_{(\mathbf{z}, y) \sim \mathbb{P}_{\mathcal{Z}\mathcal{Y}}} \ell(h(\mathbf{z}; \mathbf{W}_0), y) = \epsilon$ ;
2.  $\sup_{(\mathbf{z}, y) \sim \mathbb{P}_{\mathcal{Z}\mathcal{Y}}} \|\partial \ell(h(\mathbf{z}; \mathbf{W}_0), y) / \partial \mathbf{W}_0\|_F = \delta$ .

**Remark 1.** *It can be easily checked that, for the classifier  $h(\cdot; \mathbf{W})$  with softmax output function, the Frobenius norm of the Hessian matrix of the cross-entropy function with regard to the weight matrix  $\mathbf{W}$  is bounded given a bounded parameter space. As a results, it is always true that the cross-entropy function is  $\gamma$ -smooth, therefore justifying the above assumptions.*

**Proposition 1.** *if Assumptions 1 and 2 holds, we have:*

$$\sup_{\mathbf{W} \in \mathcal{W}} \sup_{(\mathbf{z}, y) \sim \mathbb{P}_{\mathcal{Z}\mathcal{Y}}} \ell(h(\mathbf{z}; \mathbf{W}), y) \leq A,$$

where  $A = \gamma \rho^2 + \delta \rho + \epsilon$ .

*Proof.* One can prove this by Mean Value Theorem of Integrals easily.  $\square$

**Proposition 2** (Self-bounding Property). *if Assumptions 1 and 2 holds, for any  $\mathbf{W} \in \mathcal{W}$ , we have:*

$$\|\partial \ell(h(\mathbf{z}; \mathbf{W}), y) / \partial \mathbf{W}\|_F^2 \leq 2\gamma \cdot \ell(h(\mathbf{z}; \mathbf{W}), y). \quad (1)$$

*Proof.* The detailed proof of Proposition 2 can be found in Appendix B of Lei and Ying [1].  $\square$

**Proposition 3.** *If Assumptions 1 and 2, for any empirical dataset  $\mathcal{D} \sim \mathbb{P}_{\mathcal{Z}\mathcal{Y}}^{|\mathcal{D}|}$ , we have:*

$$\left\| \mathbb{E}_{(\mathbf{z}, y) \in \mathcal{D}} \frac{\partial \ell(h(\mathbf{z}; \mathbf{W}), y)}{\partial \mathbf{W}} \right\|_F^2 \leq 2\gamma \mathbb{E}_{(\mathbf{z}, y) \in \mathcal{D}} \ell(h(\mathbf{z}; \mathbf{W}), y),$$

$$\left\| \mathbb{E}_{(\mathbf{z}, y) \sim \mathbb{P}} \frac{\partial \ell(h(\mathbf{z}; \mathbf{W}), y)}{\partial \mathbf{W}} \right\|_F^2 \leq 2\gamma \mathbb{E}_{(\mathbf{z}, y) \sim \mathbb{P}} \ell(h(\mathbf{z}; \mathbf{W}), y),$$

where we use  $\mathbb{P}$  as the abbreviation of  $\mathbb{P}_{\mathcal{Z}\mathcal{Y}}$  for brevity.

*Proof.* Given that the squared Frobenius norm  $\|\cdot\|_F^2$  is a convex function, Jensen's inequality and Proposition 2 imply that

$$\begin{aligned}
 \left\| \mathbb{E}_{(\mathbf{z}, y) \in \mathcal{D}} \frac{\partial \ell(h(\mathbf{z}; \mathbf{W}), y)}{\partial \mathbf{W}} \right\|_F^2 &\leq \mathbb{E}_{(\mathbf{z}, y) \in \mathcal{D}} \left\| \frac{\partial \ell(h(\mathbf{z}; \mathbf{W}), y)}{\partial \mathbf{W}} \right\|_F^2 \\
 &\leq \mathbb{E}_{(\mathbf{z}, y) \in \mathcal{D}} 2\gamma \cdot \ell(h(\mathbf{z}; \mathbf{W}), y) \\
 &= 2\gamma \cdot \mathbb{E}_{(\mathbf{z}, y) \in \mathcal{D}} \ell(h(\mathbf{z}; \mathbf{W}), y)
 \end{aligned}$$

$$\begin{aligned}
 \left\| \mathbb{E}_{(\mathbf{z}, y) \sim \mathbb{P}} \frac{\partial \ell(h(\mathbf{z}; \mathbf{W}), y)}{\partial \mathbf{W}} \right\|_F^2 &\leq \mathbb{E}_{(\mathbf{z}, y) \sim \mathbb{P}} \left\| \frac{\partial \ell(h(\mathbf{z}; \mathbf{W}), y)}{\partial \mathbf{W}} \right\|_F^2 \\
 &\leq \mathbb{E}_{(\mathbf{z}, y) \sim \mathbb{P}} 2\gamma \cdot \ell(h(\mathbf{z}; \mathbf{W}), y) \\
 &= 2\gamma \cdot \mathbb{E}_{(\mathbf{z}, y) \sim \mathbb{P}} \ell(h(\mathbf{z}; \mathbf{W}), y).
 \end{aligned}$$

$\square$

**Lemma 1.** *For any empirical dataset  $\mathcal{D} \sim \mathbb{P}^N$  and  $\mathbf{W} \in \mathcal{W}$ , with the probability at least  $1 - \zeta > 0$ , we have:*

$$\begin{aligned}
 &\mathbb{E}_{(\mathbf{z}, y) \in \mathcal{D}} \ell(h(\mathbf{z}; \mathbf{W}), y) \\
 &\leq \mathbb{E}_{(\mathbf{z}, y) \sim \mathbb{P}} \ell(h(\mathbf{z}; \mathbf{W}), y) + A \sqrt{\frac{\log(1/\zeta)}{2N}}.
 \end{aligned}$$

Table 1. Main notations and their descriptions.

| Notation                                | Description                                                                                                                 |
|-----------------------------------------|-----------------------------------------------------------------------------------------------------------------------------|
| $\Delta$                                | Prompt template                                                                                                             |
| $f_{\mathcal{X}}$                       | CLIP image encoder                                                                                                          |
| $f_{\mathcal{T}}$                       | CLIP text encoder                                                                                                           |
| $\mathcal{Z}, \mathcal{Y}, \mathcal{W}$ | CLIP feature space, Pseudo-label space, Parameter space                                                                     |
| $h, \mathbf{W}$                         | Classifier, Parameters of $h$                                                                                               |
| $\mathcal{D}_{\mathcal{X}}, N$          | Unlabeled image dataset, The size of $\mathcal{D}_{\mathcal{X}}$                                                            |
| $\mathcal{D}_{\mathcal{T}}, M$          | Unlabeled wild textual dataset, The size of $\mathcal{D}_{\mathcal{T}}$                                                     |
| $\mathcal{P}_{\mathcal{T}}(k), M_k$     | the ground-truth set of positive semantics whose predicted pseudo-label is $k$ , The size of $\mathcal{P}_{\mathcal{T}}(k)$ |
| $\mathbf{x}$                            | Unlabeled image                                                                                                             |
| $\mathbf{e}$                            | CLIP feature of unlabeled image                                                                                             |
| $\mathbf{y}$                            | Image pseudo-label produced by $k$ -means                                                                                   |
| $\mathbf{t}$                            | wild textual data                                                                                                           |
| $\mathbf{\tilde{r}}$                    | CLIP feature of wild textual data                                                                                           |
| $\tilde{y}$                             | The predicted pseudo-label of wild textual data from $h$                                                                    |
| $T_k$                                   | The filtering threshold for wild text data whose predicted pseudo-label is $k$                                              |
| $\ \cdot\ _F, \ \cdot\ _2$              | Frobenius norm, $L_2$ norm                                                                                                  |

Table 2. A summary of datasets used for evaluation.

| Dataset       | Training Split | Test Split | # of Training | # of Test | # of Classes |
|---------------|----------------|------------|---------------|-----------|--------------|
| STL-10        | Train          | Test       | 5000          | 8000      | 10           |
| CIFAR-10      | Train          | Test       | 50000         | 10000     | 10           |
| CIFAR-20      | Train          | Test       | 50000         | 10000     | 20           |
| ImageNet-10   | Train          | Test       | 13000         | 500       | 10           |
| ImageNet-Dogs | Train          | Test       | 19500         | 750       | 15           |
| DTD           | Train+Val      | Test       | 3760          | 1880      | 47           |
| UCF-101       | Train          | Test       | 9537          | 3783      | 101          |
| ImageNet-1K   | Train          | Test       | 1281167       | 50000     | 1000         |

*Proof.* Without loss of generality, let

$$\Omega(\mathbf{W}, \mathcal{D}) = \mathbb{E}_{(\mathbf{z}, y) \in \mathcal{D}} \ell(h(\mathbf{z}; \mathbf{W}), y),$$

$$\Omega(\mathbf{W}, \mathbb{P}) = \mathbb{E}_{(\mathbf{z}, y) \sim \mathbb{P}} \ell(h(\mathbf{z}; \mathbf{W}), y).$$

Given that

$$\mathbb{E}_{\mathcal{D} \sim \mathbb{P}^N} [\Omega(\mathbf{W}, \mathcal{D})] = \Omega(\mathbf{W}, \mathbb{P}),$$

Hoeffding’s inequality implies that, with the probability at least  $1 - \zeta > 0$ , we have:

$$\begin{aligned} \Omega(\mathbf{W}^*, \mathcal{D}) - \Omega(\mathbf{W}^\dagger, \mathbb{P}) &\leq \Omega(\mathbf{W}^\dagger, \mathcal{D}) - \Omega(\mathbf{W}^\dagger, \mathbb{P}) \\ &\leq A \sqrt{\frac{\log(1/\zeta)}{2N}}. \end{aligned}$$

□

**Lemma 2.** If Assumptions 1 and 2 holds, for any empirical dataset  $\mathcal{D} \sim \mathbb{P}^N$  and  $\mathbf{W} \in \mathcal{W}$ , with the probability at least  $1 - \zeta > 0$ , we have:

$$\begin{aligned} d_{\mathbf{W}}(\mathcal{D}, \mathbb{P}) &= \Omega(\mathbf{W}, \mathcal{D}) - \Omega(\mathbf{W}, \mathbb{P}) \\ &\leq A \sqrt{\frac{\log(1/\zeta)}{2N}} + U \sqrt{\frac{A(A - \epsilon)D}{N}}, \end{aligned}$$

$$\begin{aligned} -d_{\mathbf{W}}(\mathcal{D}, \mathbb{P}) &= \Omega(\mathbf{W}, \mathbb{P}) - \Omega(\mathbf{W}, \mathcal{D}) \\ &\leq A \sqrt{\frac{\log(1/\zeta)}{2N}} + U \sqrt{\frac{A(A - \epsilon)D}{N}}, \end{aligned}$$

where  $D$  is the dimension of the parameter space  $\mathcal{W}$ ,  $U$  is a uniform constant, and

$$\Omega(\mathbf{W}, \mathcal{D}) = \mathbb{E}_{(\mathbf{z}, y) \in \mathcal{D}} \ell(h(\mathbf{z}; \mathbf{W}), y),$$

$$\Omega(\mathbf{W}, \mathbb{P}) = \mathbb{E}_{(\mathbf{z}, y) \sim \mathbb{P}} \ell(h(\mathbf{z}; \mathbf{W}), y).$$

*Proof.* Since it can be easily checked that

$$\mathbb{E}_{D \sim \mathbb{P}^N} [d_{\mathbf{W}}(\mathcal{D}, \mathbb{P})] = 0,$$

For any  $\mathbf{W} \in \mathcal{W}$  and  $\mathbf{W}' \in \mathcal{W}$ , Proposition 2.6.1 and Lemma 2.6.8 in Vershynin [2] imply that

$$\begin{aligned} & \|d_{\mathbf{W}}(\mathcal{D}, \mathbb{P}) - d_{\mathbf{W}'}(\mathcal{D}, \mathbb{P})\|_{\Phi} \\ & \leq \frac{u_0}{\sqrt{N}} \|\ell(h(\mathbf{z}; \mathbf{W}), y) - \ell(h(\mathbf{z}; \mathbf{W}'), y)\|_{L^\infty(\mathcal{Z} \times \mathcal{Y})}, \end{aligned}$$

where  $\|\cdot\|_{\Phi}$  is the sub-gaussian norm and  $u_0$  is a uniform constant. Therefore, the Dudley's entropy integral [2] implies that

$$\begin{aligned} & \mathbb{E}_{D \sim \mathbb{P}^N} \sup_{\mathbf{W} \in \mathcal{W}} d_{\mathbf{W}}(\mathcal{D}, \mathbb{P}) \\ & \leq \frac{u_1}{\sqrt{N}} \int_0^{+\infty} \sqrt{\log \Upsilon(\mathcal{F}, o, L^\infty)} do, \end{aligned}$$

where  $\mathcal{F} = \{\ell(h(\mathbf{z}|\mathbf{W}), y) : \mathbf{W} \in \mathcal{W}\}$ ,  $u_1$  is another uniform constant, and  $\Upsilon(\mathcal{F}, o, \|\cdot\|_{\max})$  is the covering number under the  $L^\infty$  norm. Due to the fact that

$$\begin{aligned} & \mathbb{E}_{D \sim \mathbb{P}^N} \sup_{\mathbf{W} \in \mathcal{W}} d_{\mathbf{W}}(\mathcal{D}, \mathbb{P}) \\ & \leq \frac{u_1}{\sqrt{N}} \int_0^{+\infty} \sqrt{\log \Upsilon(\mathcal{F}, o, L^\infty)} do \\ & \quad \frac{u_1}{\sqrt{N}} \int_0^A \sqrt{\log \Upsilon(\mathcal{F}, o, L^\infty)} do \\ & = \frac{u_1}{\sqrt{N}} A \int_0^1 \sqrt{\log \Upsilon(\mathcal{F}, A \cdot o, L^\infty)} do, \end{aligned}$$

according to the McDiarmid's Inequality, for any  $\mathbf{W} \in \mathcal{W}$ , with the probability at least  $1 - \zeta > 0$ , we have either

$$\begin{aligned} & d_{\mathbf{W}}(\mathcal{D}, \mathbb{P}) \\ & \leq \frac{u_1}{\sqrt{N}} A \int_0^1 \sqrt{\log \Upsilon(\mathcal{F}, A \cdot o, L^\infty)} do + A \sqrt{\frac{\log(1/\zeta)}{2N}} \end{aligned}$$

or

$$\begin{aligned} & -d_{\mathbf{W}}(\mathcal{D}, \mathbb{P}) \\ & \leq \frac{u_1}{\sqrt{N}} A \int_0^1 \sqrt{\log \Upsilon(\mathcal{F}, A \cdot o, L^\infty)} do + A \sqrt{\frac{\log(1/\zeta)}{2N}}. \end{aligned}$$

Note that  $\ell(h(\mathbf{z}; \mathbf{W}), y)$  is  $(\gamma\rho + \delta)$ -Lipschitz with regard to  $\mathbf{W}$  under  $\|\cdot\|_F$ . Then

$$\begin{aligned} & \Upsilon(\mathcal{F}, A \cdot o, L^\infty) \\ & \leq \Upsilon(\mathcal{W}, A \cdot o/(\gamma\rho + \delta), \|\cdot\|_F) \\ & \leq (1 + \frac{2\rho(\gamma\rho + \delta)}{A \cdot o})^D \\ & \leq (1 + \frac{2(A - \epsilon)}{A \cdot o})^D, \end{aligned}$$

such that

$$\begin{aligned} & \frac{u_1}{\sqrt{N}} A \int_0^1 \sqrt{\log \Upsilon(\mathcal{F}, A \cdot o, L^\infty)} do \\ & = \frac{u_1}{\sqrt{N}} A \int_0^1 \sqrt{\log(1 + \frac{2(A - \epsilon)}{A \cdot o})^D} do \\ & = \frac{u_1}{\sqrt{N}} A \int_0^1 \sqrt{D \log(1 + \frac{2(A - \epsilon)}{A \cdot o})} do \\ & \leq \frac{u_1}{\sqrt{N}} A \sqrt{D} \int_0^1 \sqrt{\frac{2(A - \epsilon)}{A \cdot o}} do \\ & = 2 \frac{u_1}{\sqrt{N}} A \sqrt{D} \sqrt{\frac{2(A - \epsilon)}{A}} \\ & = U \sqrt{\frac{A(A - \epsilon)D}{N}}, \end{aligned}$$

where  $U = 2\sqrt{2}u_1$ .  $\square$

**Lemma 3.** If Assumptions 1 and 2 hold, for any empirical dataset  $\mathcal{D} \sim \mathbb{P}^N$  and  $\mathcal{D}' \sim \mathbb{P}^{N'}$ , with the probability at least  $(1 - \zeta)^3 > 0$ , we have

$$\begin{aligned} & \Omega(\mathbf{W}^*, \mathcal{D}') \\ & \leq \Omega(\mathbf{W}^\dagger, \mathbb{P}) + A \sqrt{\frac{\log(1/\zeta)}{2N'}} + U \sqrt{\frac{A(A - \epsilon)D}{N'}} \\ & \quad + 2A \sqrt{\frac{\log(1/\zeta)}{2N}} + U \sqrt{\frac{A(A - \epsilon)D}{N}}, \end{aligned}$$

where  $D$  is the dimension of the parameter space  $\mathcal{W}$ ,  $U$  is a uniform constant, and

$$\begin{aligned} \mathbf{W}^* & = \arg \min_{\mathbf{W} \in \mathcal{W}} \mathbb{E}_{(\mathbf{z}, y) \in \mathcal{D}} \ell(h(\mathbf{z}; \mathbf{W}), y) \\ & = \arg \min_{\mathbf{W} \in \mathcal{W}} \Omega(\mathbf{W}, \mathcal{D}), \\ \mathbf{W}^\dagger & = \arg \min_{\mathbf{W} \in \mathcal{W}} \mathbb{E}_{(\mathbf{z}, y) \in \mathbb{P}} \ell(h(\mathbf{z}; \mathbf{W}), y) \\ & = \arg \min_{\mathbf{W} \in \mathcal{W}} \Omega(\mathbf{W}, \mathbb{P}), \\ \Omega(\mathbf{W}^*, \mathcal{D}') & = \mathbb{E}_{(\mathbf{z}, y) \in \mathcal{D}'} \ell(h(\mathbf{z}; \mathbf{W}^*), y). \end{aligned}$$

*Proof.* Given that

$$\begin{aligned} & \Omega(\mathbf{W}^*, \mathcal{D}') - \Omega(\mathbf{W}^\dagger, \mathbb{P}) \\ & = \Omega(\mathbf{W}^*, \mathcal{D}') - \Omega(\mathbf{W}^*, \mathbb{P}) + \Omega(\mathbf{W}^*, \mathbb{P}) - \Omega(\mathbf{W}^*, \mathcal{D}) \\ & \quad + \Omega(\mathbf{W}^*, \mathcal{D}) - \Omega(\mathbf{W}^\dagger, \mathbb{P}) \\ & \leq \Omega(\mathbf{W}^*, \mathcal{D}') - \Omega(\mathbf{W}^*, \mathbb{P}) + \Omega(\mathbf{W}^*, \mathbb{P}) - \Omega(\mathbf{W}^*, \mathcal{D}) \\ & \quad + \Omega(\mathbf{W}^\dagger, \mathcal{D}) - \Omega(\mathbf{W}^\dagger, \mathbb{P}) \\ & = d_{\mathbf{W}^*}(\mathcal{D}', \mathbb{P}) - d_{\mathbf{W}^*}(\mathbb{P}, \mathcal{D}) + \Omega(\mathbf{W}^\dagger, \mathcal{D}) - \Omega(\mathbf{W}^\dagger, \mathbb{P}), \end{aligned}$$

Lemmas 1 and 2 imply that, with the probability at least  $(1 - \zeta)^3 > 0$ , we have all of the following:

$$d_{\mathbf{W}}(\mathcal{D}', \mathbb{P}) \leq A \sqrt{\frac{\log(1/\zeta)}{2N'}} + U \sqrt{\frac{A(A - \epsilon)D}{N'}},$$

$$-d_{\mathbf{W}^*}(\mathbb{P}, \mathcal{D}) \leq A\sqrt{\frac{\log(1/\zeta)}{2N}} + U\sqrt{\frac{A(A-\epsilon)D}{N}}.$$

$$\Omega(\mathbf{W}^\dagger, \mathcal{D}) - \Omega(\mathbf{W}^\dagger, \mathbb{P}) \leq A\sqrt{\frac{\log(1/\zeta)}{2N}}.$$

□

**Lemma 4.** If Assumptions 1 and 2 hold, for any empirical dataset  $\mathcal{D} \sim \mathbb{P}^N$  and  $\mathcal{D}' \sim \mathbb{P}^{N'}$ , with the probability at least  $(1 - \zeta)^3 > 0$ , we have

$$\begin{aligned} & \mathbb{E}_{(\mathbf{z}, y) \in \mathcal{D}'} \left\| \partial \ell(h(\mathbf{z}; \mathbf{W}^*), \hat{y}) / \partial \mathbf{W}^* \right\|_F^2 \\ & \leq 2\gamma \Omega(\mathbf{W}^\dagger, \mathbb{P}) + 2\gamma \left( A\sqrt{\frac{\log(1/\zeta)}{2N'}} + U\sqrt{\frac{A(A-\epsilon)D}{N'}} \right. \\ & \quad \left. + 2A\sqrt{\frac{\log(1/\zeta)}{2N}} + U\sqrt{\frac{A(A-\epsilon)D}{N}} \right), \end{aligned}$$

where  $D$  is the dimension of the parameter space  $\mathcal{W}$ ,  $U$  is a uniform constant,  $\hat{y} = \arg \min_{k \in [C]} \ell(h(\mathbf{z}; \mathbf{W}^*), k)$ , and

$$\begin{aligned} \mathbf{W}^* &= \arg \min_{\mathbf{W} \in \mathcal{W}} \mathbb{E}_{(\mathbf{z}, y) \in \mathcal{D}} \ell(h(\mathbf{z}; \mathbf{W}), y) \\ &= \arg \min_{\mathbf{W} \in \mathcal{W}} \Omega(\mathbf{W}, \mathcal{D}). \end{aligned}$$

*Proof.* By Proposition 2 and Lemma 3, with the probability at least  $(1 - \zeta)^3 > 0$ , we have

$$\begin{aligned} & \mathbb{E}_{(\mathbf{z}, y) \in \mathcal{D}'} \left\| \partial \ell(h(\mathbf{z}; \mathbf{W}), \hat{y}) / \partial \mathbf{W} \right\|_F^2 \\ & \leq \mathbb{E}_{(\mathbf{z}, y) \in \mathcal{D}'} 2\gamma \cdot \ell(h(\mathbf{z}; \mathbf{W}), \hat{y}) \\ & \leq \mathbb{E}_{(\mathbf{z}, y) \in \mathcal{D}'} 2\gamma \cdot \ell(h(\mathbf{z}; \mathbf{W}), y) \\ & = 2\gamma \Omega(\mathbf{W}, \mathcal{D}) \\ & \leq 2\gamma \Omega(\mathbf{W}^\dagger, \mathbb{P}) + 2\gamma \left( A\sqrt{\frac{\log(1/\zeta)}{2N'}} + U\sqrt{\frac{A(A-\epsilon)D}{N'}} \right. \\ & \quad \left. + 2A\sqrt{\frac{\log(1/\zeta)}{2N}} + U\sqrt{\frac{A(A-\epsilon)D}{N}} \right). \end{aligned}$$

□

**Lemma 5.** Let us define the ground-truth set of positive semantics from the wild data as

$$\mathcal{P}_{\mathcal{T}}(k) = \left\{ \tilde{\mathbf{t}}_i \in \mathcal{D}_{\mathcal{T}} : \tilde{\mathbf{t}}_i \sim \mathbb{P}_{pos} \text{ and } k = \arg \max_{j \in [L]} \pi_{ij} \right\}$$

and  $|\mathcal{P}_{\mathcal{T}}(k)| = B_k$ . If Assumptions 1 and 2 hold, with the probability at least  $(1 - \zeta)^3 > 0$ , we have the following:

$$\begin{aligned} & \mathbb{E}_{\tilde{\mathbf{t}}_i \in \mathcal{P}_{\mathcal{T}}(k)} \left\| \partial \ell(h(\tilde{\mathbf{r}}_i; \mathbf{W}^*), \tilde{y}) / \partial \mathbf{W}^* \right\|_F^2 \\ & \leq 2\gamma \Omega(\mathbf{W}^\dagger, \mathbb{P}) + 2\gamma \left( A\sqrt{\frac{\log(1/\zeta)}{2B_k}} + U\sqrt{\frac{A(A-\epsilon)D}{B_k}} \right. \\ & \quad \left. + 2A\sqrt{\frac{\log(1/\zeta)}{2N}} + U\sqrt{\frac{A(A-\epsilon)D}{N}} \right), \end{aligned}$$

where  $D$  is the dimension of the parameter space  $\mathcal{W}$ ,  $U$  is a uniform constant,  $\tilde{y}_i = \arg \min_{k \in [C]} \ell(h(\tilde{\mathbf{t}}_i; \mathbf{W}^*), k)$ , and

$$\mathbf{W}^* = \arg \min_{\mathbf{W} \in \mathcal{W}} \frac{1}{N} \sum_{i=1}^N \ell(h(\mathbf{e}_i; \mathbf{W}), y_i).$$

*Proof.* Lemma 4 directly implies this result. □

## 4. Proof of Theorem 1 in Main Content

**Theorem 1.** Let us define the ground-truth set of positive semantics from the wild data as

$$\mathcal{P}_{\mathcal{T}}(k) = \left\{ \tilde{\mathbf{t}}_i \in \mathcal{D}_{\mathcal{T}} : \tilde{\mathbf{t}}_i \sim \mathbb{P}_{pos} \text{ and } k = \arg \max_{j \in [L]} \pi_{ij} \right\}$$

and  $|\mathcal{P}_{\mathcal{T}}(k)| = B_k$ . If Assumptions 1 and 2 hold, with the probability at least 0.97, we have the following:

$$\begin{aligned} ERR_{pos}(k) &\triangleq \frac{|\{\tilde{\mathbf{t}}_i \in \mathcal{P}_{\mathcal{T}}(k) : S(\tilde{\mathbf{t}}_i) > T_k\}|}{O_k} \\ &\leq \frac{2\gamma}{T_k} \left[ \min_{\mathbf{W} \in \mathcal{W}} \Omega(\mathbf{W}) + O(\sqrt{\frac{1}{B_k}}) + O(\sqrt{\frac{1}{N}}) \right], \end{aligned}$$

where  $O(1/N, 1/B_k) \geq 0$  is a uniform constant that is positively correlated to  $1/N$  and  $1/O_k$ , and  $\Omega(\mathbf{W}) = \mathbb{E}_{(\mathbf{z}, y) \in \mathbb{P}_{ZY}} \ell(h(\mathbf{z}; \mathbf{W}), y)$  denotes the expected risk.

*Proof.* Let  $S_k$  be the uniform random variable with  $\mathcal{P}_{\mathcal{T}}(k)$  as the support and  $S_k(\tilde{\mathbf{t}}_i) = \Phi(\tilde{\mathbf{t}}_i)$  for any  $\tilde{\mathbf{t}}_i \in \mathcal{P}_{\mathcal{T}}(k)$ , then by the Markov inequality, we have

$$\begin{aligned} ERR_{pos}(k) &\triangleq \frac{|\{\tilde{\mathbf{t}}_i \in \mathcal{P}_{\mathcal{T}}(k) : S(\tilde{\mathbf{t}}_i) > T_k\}|}{O_k} \\ &\leq \frac{1}{T_k} \mathbb{E}_{\tilde{\mathbf{t}}_i \in \mathcal{P}_{\mathcal{T}}(k)} [S_k(\tilde{\mathbf{t}}_i)]. \end{aligned}$$

As implied by Lemma 5, with the probability at least  $(1 - \zeta)^3 > 0$ , we have the following:

$$\begin{aligned} & \mathbb{E}_{\tilde{\mathbf{t}}_i \in \mathcal{P}_{\mathcal{T}}(k)} [S_k(\tilde{\mathbf{t}}_i)] \\ & = \mathbb{E}_{\tilde{\mathbf{t}}_i \in \mathcal{P}_{\mathcal{T}}(k)} \left\| \partial \ell(h(\tilde{\mathbf{r}}_i; \mathbf{W}^*), \tilde{y}) / \partial \mathbf{W}^* \right\|_F^2 \\ & \leq 2\gamma \Omega(\mathbf{W}^\dagger, \mathbb{P}) + 2\gamma \left( A\sqrt{\frac{\log(1/\zeta)}{2B_k}} + U\sqrt{\frac{A(A-\epsilon)D}{B_k}} \right. \\ & \quad \left. + 2A\sqrt{\frac{\log(1/\zeta)}{2N}} + U\sqrt{\frac{A(A-\epsilon)D}{N}} \right). \end{aligned}$$

If we set  $\zeta = 0.01$ , with the probability at least  $(1 -$

$0.01)^3 = 0.97$ , we have:

$$\begin{aligned}
& \frac{|\{\tilde{\mathbf{t}}_i \in \mathcal{P}_{\mathcal{T}}(k) : S(\tilde{\mathbf{t}}_i) > T_k\}|}{B_k} \\
& \leq \frac{2\gamma}{T_k} \Omega(\mathbf{W}^\dagger, \mathbb{P}) + \frac{2\gamma}{T_k} \underbrace{\left( A \sqrt{\frac{\log 10}{B_k}} + U \sqrt{\frac{A(A-\epsilon)D}{B_k}} \right)}_{O(\sqrt{1/B_k})} \\
& \quad + \frac{2\gamma}{T_k} \underbrace{\left( 2A \sqrt{\frac{\log 10}{N}} + U \sqrt{\frac{A(A-\epsilon)D}{N}} \right)}_{O(\sqrt{1/N})}.
\end{aligned}$$

□

## References

- [1] Yunwen Lei and Yiming Ying. Sharper generalization bounds for learning with gradient-dominated objective functions. In *International Conference on Learning Representations*, 2021. [1](#)
- [2] Roman Vershynin. High-dimensional probability, 2009. [3](#)
